# Supplementary material for: Sculpturing metal foams toward bifunctional 3D copper oxide nanowire arrays for pseudo-capacitance and enzyme-free hydrogen peroxide detection
Source: Royal Society of Chemistry journal article supplement (doi:10.1039/c5ta00847f), 2015-01-01
Supplement: c5ta00847f1.pdf [file c5ta00847f1.pdf]

Electronic Supplementary Information

# Sculpturing Metal Foams toward Bifunctional 3D Copper Oxide Nanowire Arrays for Pseudo- capacitance and Enzyme-free Hydrogen Peroxide Detection

Jianfei Huang, Huailong Li, Yihua Zhu\*, Qilin Cheng, Xiaoling Yang and Chunzhong Li\*

Key Laboratory for Ultrafine Materials of Ministry of Education, School of Materials Science and Engineering, East China University of Science and Technology

\*Email: yhzhu@ecust.edu.cn, czli@ecust.edu.cn;

Fax: +86 21 6425 0624;

Tel: +86 21 6425 2022

### Preparation of TO-CuO/Cu composite foam

Preparation of the TO-CuO/Cu was accomplished as follows. First, a Cu foam was cleaned in deionized water and ethanol under sonication and dried in N<sub>2</sub> flow. Then it was heated to 300 °C in a furnace for 400 min and naturally cooled to room temperature without opening the furnace. The ramp rate was ~2 °C min<sup>-1</sup>.

**Notes:** The XRD pattern of the TO-CuO/Cu can be attributed to Cu<sub>2</sub>O and Cu. The moderate intensity of signals from copper oxide and strong diffraction peaks from metallic copper typically suggest the limited oxidation into the Cu bulk. However, the occurrence of nanowire structures also exemplify the phenomenon of well-studied dry oxidation of copper substrate, where similar condition led to formation of CuO nanowires, CuO outer layer, Cu<sub>2</sub>O interlayer on the Cu substrate.<sup>1,2</sup> Combined with the SEM image of TO-CuO/Cu in Fig. S1b, the XRD pattern of the TO-CuO/Cu, and the information from previous reports on the thermal oxidation of Cu substrates, it can be concluded that the TO-CuO/Cu prepared in this work possesses very low-density scattered short CuO nanowires on its surface, a CuO surface and a Cu<sub>2</sub>O interlayer on the macroscopic Cu foam, which can serve as a control that stands for macroporous CuO/Cu foam with planar surface without high-density CuO nanowire arrays.

### Calculations

For CV measurements, the areal specific capacitance of the 3D-CuONA/Cu and the TO-CuO/Cu composites were calculated using the following equation:

$$C_{AS} = 1 / (2v \times \Delta V) \times \int J(V)dV$$

where  $C_{AS}$  is the areal specific capacitance (mF cm<sup>-2</sup>),  $v$  is the scan rate (V s<sup>-1</sup>),  $\Delta V$  is the potential window (V), and  $J$  is the current density (mA cm<sup>-2</sup>).

For galvanostatic measurements, the areal specific capacitance of the 3D-CuONA/Cu and the TO-CuO/Cu composites were calculated using the following equation:

$$C_{AS} = J \times \Delta t / \Delta V$$

where  $C_{AS}$  is the areal specific capacitance (mF cm<sup>-2</sup>),  $\Delta t$  is the discharge time (s),  $\Delta V$  is the potential window (V), and  $J$  is the current density (mA cm<sup>-2</sup>).

For other materials from previous published literatures mentioned in the main text, their areal specific capacitances are either directly given in the corresponding references or calculated from the weight specific capacitance with the loading mass of active materials that can be obtained from the corresponding references. The equation for calculation is as below:

$$C_{AS} = C_{WS} \times M_A = C_{WS} \times M / S$$

where  $C_{AS}$  is the areal specific capacitance ( $\text{mF cm}^{-2}$ ),  $C_{WS}$  is the weight specific capacitance ( $\text{mF mg}^{-1}$ ),  $M_A$  is the loading mass of active materials per geometric/nominal area of the electrode ( $\text{mg cm}^{-2}$ ),  $M$  is the total loading mass of active materials (mg), and  $S$  is the geometric/nominal area of the electrode ( $\text{cm}^2$ ). The  $M$  is obtained by measuring the weight of the 3D-CuONA/Cu sample before and after treatment in excessive hydrochloride acid using a microbalance (METTLER TOLEDO) with an accuracy of 10  $\mu\text{g}$ . The loading mass of the active materials is  $3.58 \text{ mg cm}^{-2}$ .

## FIGURES

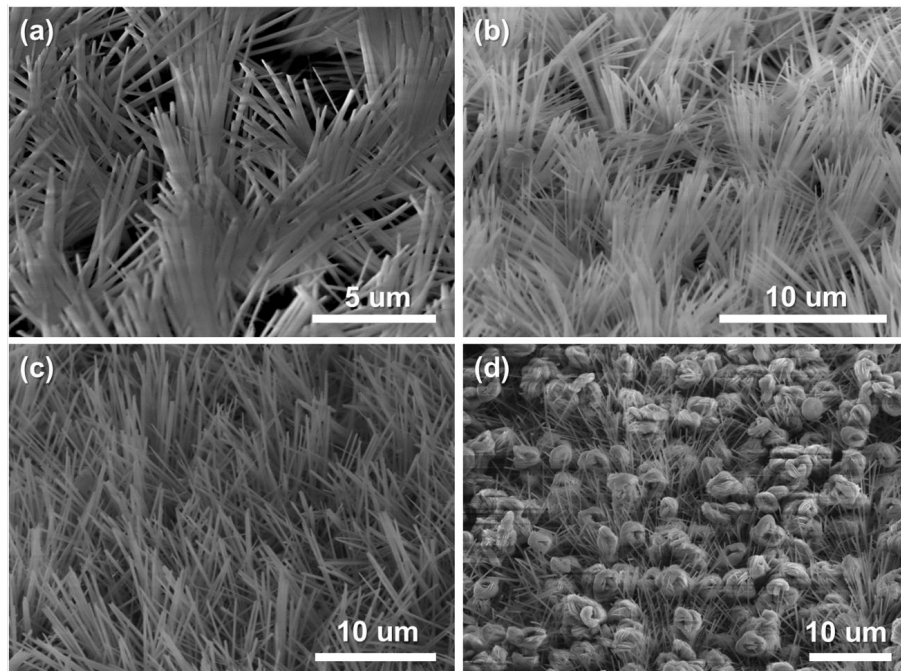

**Fig. S1** Microstructure morphologies formed after wet-chemical treatment of Cu substrate at different immersion duration: (a) 10 min, (b) 15 min, (c) 30 min, with respective nanowire length of about 6, 9 and 12  $\mu\text{m}$ , and (d) 60 min, with flower-like particles deposited on the nanowire arrays.

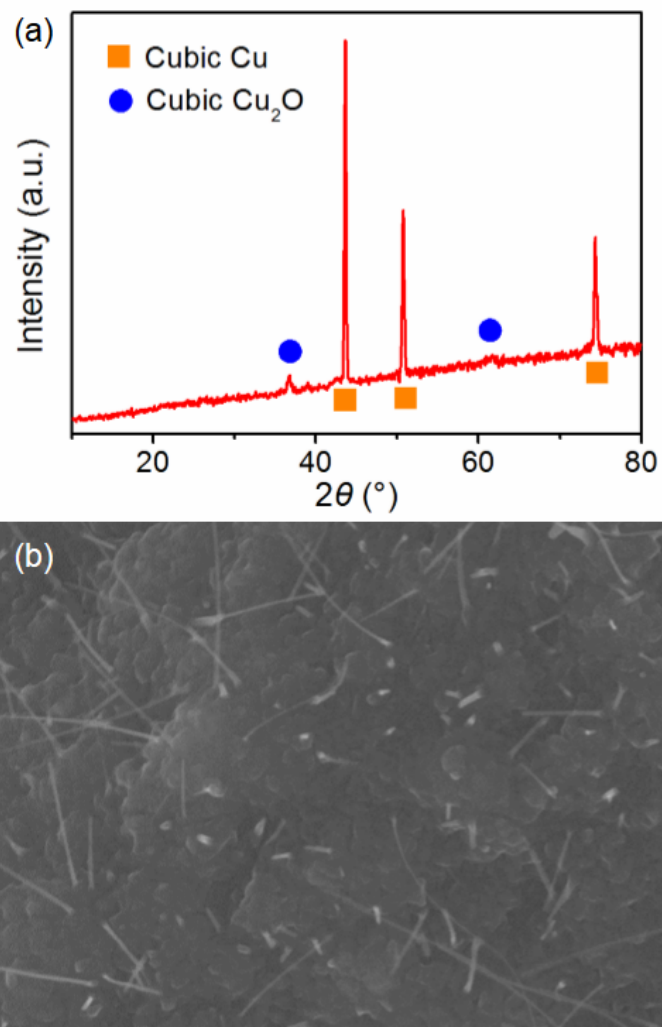

**Fig. S2** XRD pattern (a) and SEM image (b) of the TO-CuO/Cu foam.

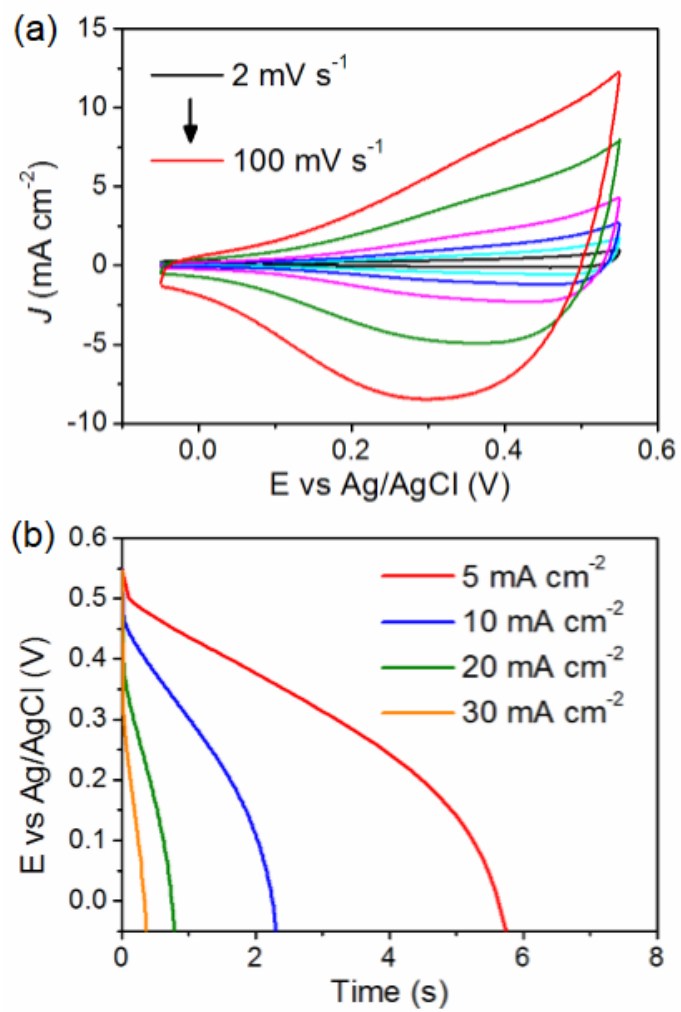

**Fig. S3** (a) CV of the TO-CuO/Cu at scan rates from 2 to 100 mV s<sup>-1</sup>. (b) Galvanostatic discharge curve of the TO-CuO/Cu at current densities from 5 to 30 mA cm<sup>-2</sup>.

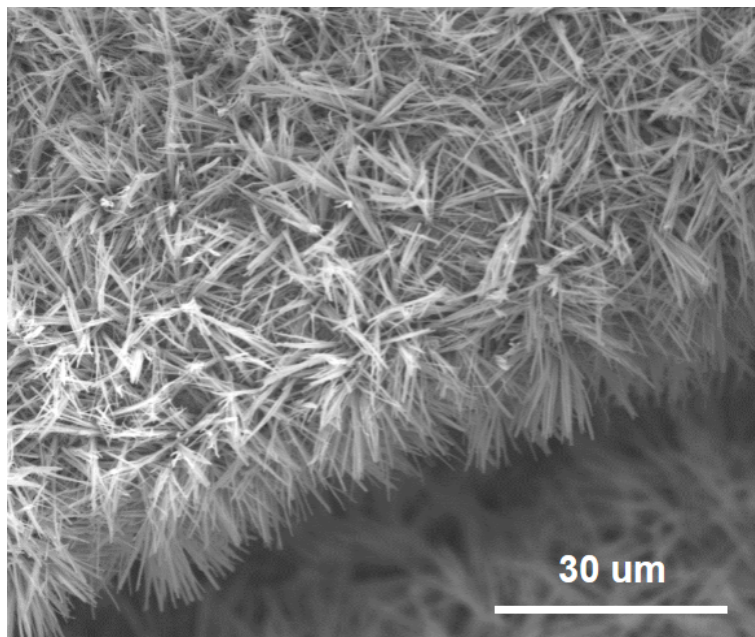

**Fig. S4** SEM image of 3D-CuONA/Cu after the cycling tests.

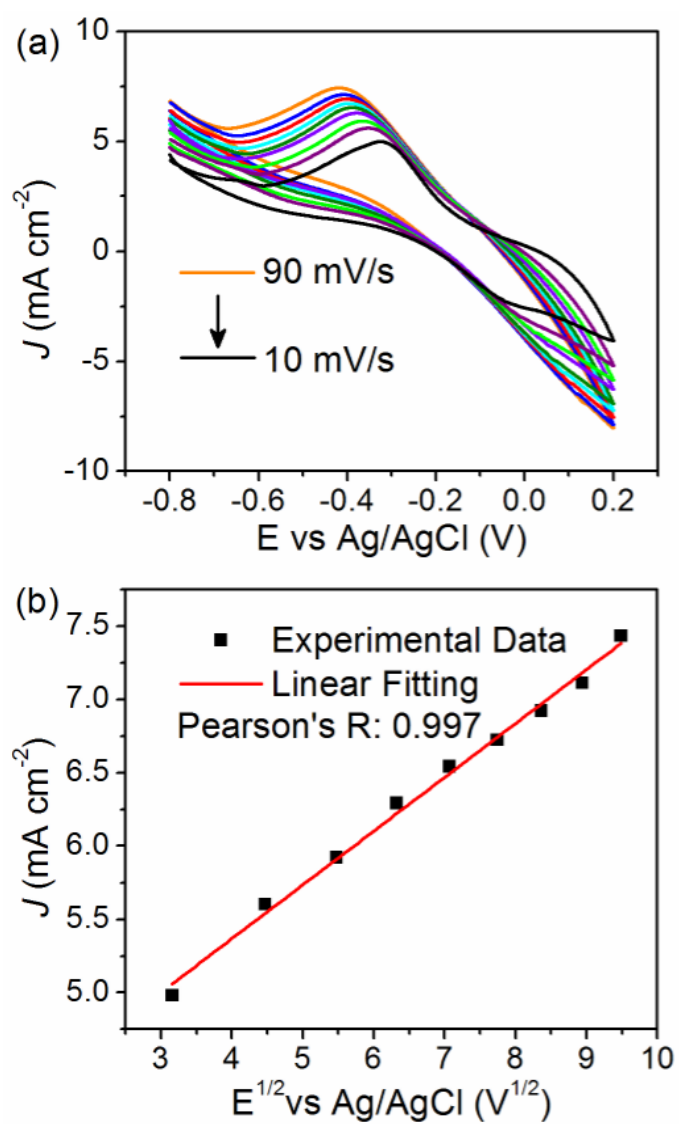

**Fig. S5** (a) CV of the 3D-CuONA/Cu foam at scan rates from 10 to 90 mV/s with 2 mM H<sub>2</sub>O<sub>2</sub> in presence and (b) its calibration plot.

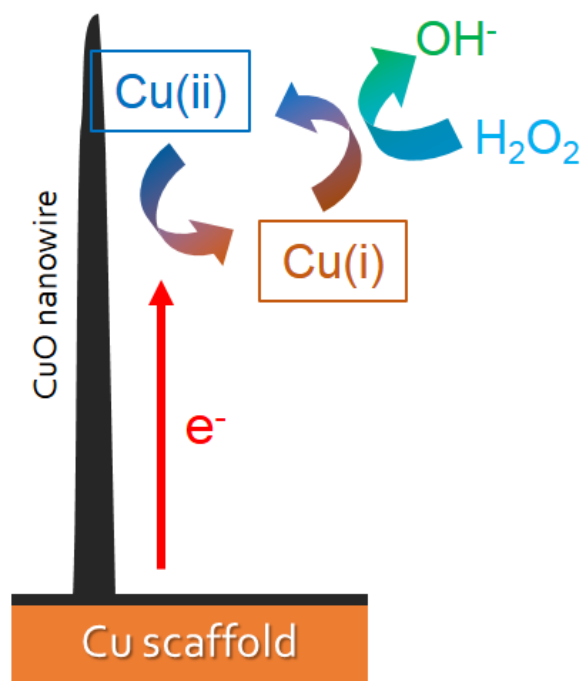

**Fig. S6** Schematic illustration of possible H<sub>2</sub>O<sub>2</sub> sensing mechanism for the 3D-CuONA/Cu composite.

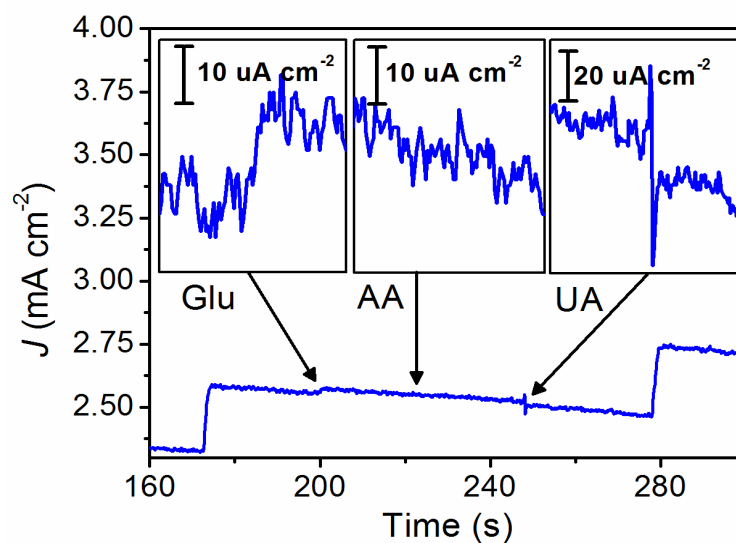

**Fig. S7** Amperometric measurement for selectivity of 3D-CuONA/Cu with successive addition of 50  $\mu\text{M}$  target analyte and interfering species. The adding sequence is  $\text{H}_2\text{O}_2$ , D-glucose, ascorbic acid, uric acid and  $\text{H}_2\text{O}_2$ . Insets show magnified current curve where interfering species are introduced.

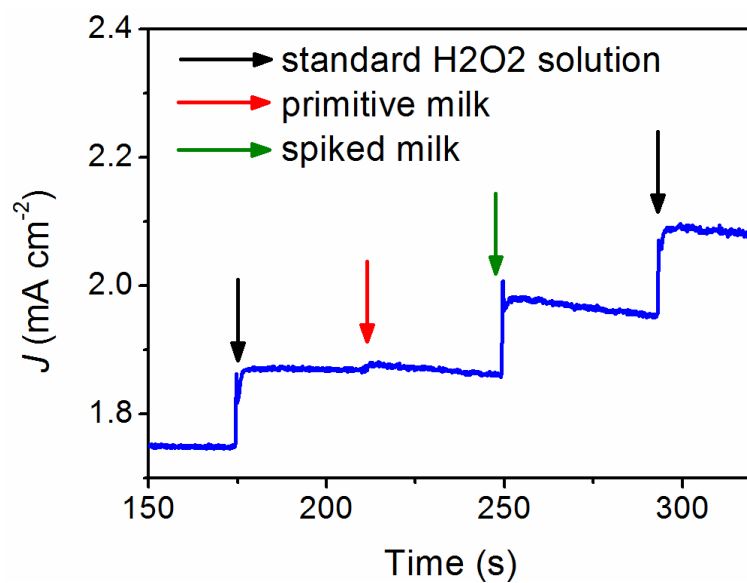

**Fig. S8** Amperometric measurement with addition of primitive and spiked milk samples and standard  $\text{H}_2\text{O}_2$  solution, 20  $\mu\text{M}$   $\text{H}_2\text{O}_2$  for all injections.

## TABLES

**Tab. S1** Capacity of 3D-CuONA/Cu at various scan rates (by cyclic voltammetry) and current densities (by chronopotentiometry)

| Scan Rate/Current<br>Densities<br>(mV s <sup>-1</sup> /mA cm <sup>-2</sup> ) |     | Areal Specific Capacitance<br>(mF cm <sup>-2</sup> ) | Weight Specific Capacitance<br>(F g <sup>-1</sup> ) |
|------------------------------------------------------------------------------|-----|------------------------------------------------------|-----------------------------------------------------|
| Cyclic Voltammetry                                                           | 2   | 608                                                  | 170                                                 |
|                                                                              | 5   | 536                                                  | 150                                                 |
|                                                                              | 10  | 471                                                  | 132                                                 |
|                                                                              | 20  | 391                                                  | 109                                                 |
|                                                                              | 50  | 268                                                  | 75                                                  |
|                                                                              | 100 | 173                                                  | 48                                                  |
| Chronopotentiometry                                                          | 5   | 535                                                  | 149                                                 |
|                                                                              | 10  | 453                                                  | 127                                                 |
|                                                                              | 20  | 373                                                  | 104                                                 |
|                                                                              | 30  | 280                                                  | 78                                                  |

**Tab. S2** Performance comparison for electrochemical H<sub>2</sub>O<sub>2</sub> detection based on enzyme-free materials

| Electrode Materials                                                  | Sensitivity<br>( $\mu\text{A mM}^{-1} \text{cm}^{-2}$ ) | Detection<br>Limit<br>( $\mu\text{M}$ ) | Response<br>Time<br>(s) | Ref.         |
|----------------------------------------------------------------------|---------------------------------------------------------|-----------------------------------------|-------------------------|--------------|
| CoOOH nanosheet                                                      | 99                                                      | 40                                      | <3                      | 3            |
| Au nanoparticles-graphene-chitosan                                   | Not available                                           | 1.6                                     | <5                      | 4            |
| Grass-like CuO                                                       | 80.4                                                    | 0.167                                   | <3                      | 5            |
| Ag-MnO <sub>2</sub> -Multiwalled Carbon<br>Nanotube                  | 82.5                                                    | 1.7                                     | 2                       | 6            |
| Ag@AgCl Nanoboxes                                                    | 88.8                                                    | 1.7                                     | ~1                      | 7            |
| Multiwalled carbon<br>nanotube/polyaniline/platinum<br>nanoparticles | 748.4                                                   | 2.0                                     | <5                      | 8            |
| Pt nanoparticles-Ni foam                                             | 829                                                     | 0.3                                     | Not<br>Specified        | 9            |
| Co <sub>3</sub> O <sub>4</sub> nanowires/3D N-doped carbon<br>foam   | 0.23                                                    | 1.4                                     | $\leq 3$                | 10           |
| 3D GN/ Multiwalled carbon nanotube<br>/Pt Nanoparticle               | Not available                                           | 0.0086                                  | 1.5                     | 11           |
| CuO nanoparticle-Si nanowire                                         | 315                                                     | 1.6                                     | 1.5                     | 12           |
| 3D-CuONA/Cu foam                                                     | 5750                                                    | 0.56                                    | ~2                      | This<br>work |

## REFERENCES

- 1 A. Kargar, Y. Jing, S. J. Kim, C. T. Riley, X. Pan and D. Wang, *ACS Nano*, 2013, **7**, 11112-11120.
- 2 A. T. Garcia-Esparza, K. Limkraisassiri, F. Leroy, S. Rasul, W. Yu, L. Lin and K. Takanabe, *J. Mater. Chem. A*, 2014, **2**, 7389-7401.
- 3 K. K. Lee, P. Y. Loh, C. H. Sow and W. S. Chin, *Biosens. Bioelectron.*, 2013, **39**, 255-260.
- 4 N. Jia, B. Huang, L. Chen, L. Tan and S. Yao, *Sens. Actuators, B*, 2014, **195**, 165-170.
- 5 P. Gao and D. Liu, *Sens. Actuators, B*, 2014, **208**, 346-354.
- 6 Y. Han, J. Zheng and S. Dong, *Electrochim. Acta*, 2013, **90**, 35-43.
- 7 Y. Li, J. Zheng, Q. Sheng and B. Wang, *Microchim. Acta*, 2014, **182**, 61-68.
- 8 H. Zhong, R. Yuan, Y. Chai, Y. Zhang, C. Wang and F. Jia, *Microchim. Acta*, 2012, **176**, 389-395.
- 9 X. Lu, X. Xiao, Z. Li, F. Xu, H. Tan, L. Sun and L. Wang, *Anal. Methods*, 2014, **6**, 235-241.
- 10 M. Liu, S. He and W. Chen, *Nanoscale*, 2014, **6**, 11769-11776.
- 11 X. Cao, Z. Zeng, W. Shi, P. Yep, Q. Yan and H. Zhang, *Small*, 2013, **9**, 1703-1707.
- 12 J. Huang, Y. Zhu, H. Zhong, X. Yang and C. Li, *ACS Appl. Mater. Interfaces*, 2014, **6**, 7055-7062.
